# Supplementary material
Source: PubMed Central journal article supplement (PMC2837284)
Supplement: NIHMS181349-supplement-01.pdf [file NIHMS181349-supplement-01.pdf]

**Figure S1:** Flow cytometric analysis, related to Figure 1.

**Figure S2:** Analysis of transplanted mice, related to Figures 2 and 3.

**Figure S3:** 4-week analysis of HSC subtypes using single cell transplantation, related to Figure 4.

**Figure S4:** Verification of expression of differentially expressed microarray genes by real-time PCR, related to Tables S2-4.

**Figure S5:** Cell cycle and proliferative status of HSC subtypes, related to Figure 6.

**Figure S6:** Effects of TGF $\beta$ 1 and -3 on HSC subtypes, related to Figure 6.

**Figure S7:** Gating scheme for analysis of effect of TGF $\beta$ 1 on transplanted My-HSC and Ly-HSC populations, related to Figure 6.

**Table S1:** Statistical measures for transplantation studies, related to Figures 2-5.

**Table S2:** Probe information for all microarray chips.

**Table S3:** Genes upregulated in My-HSCs compared to Ly-HSCs.

**Table S4:** Genes upregulated in Ly-HSCs compared to My-HSCs.

## Distinct Hematopoietic Stem Cell Subtypes Are Differentially Regulated by TGF $\beta$ 1

Grant A. Challen, Nathan C. Boles, Stuart M. Chambers and Margaret A. Goodell

### SUPPLEMENTAL FIGURES:

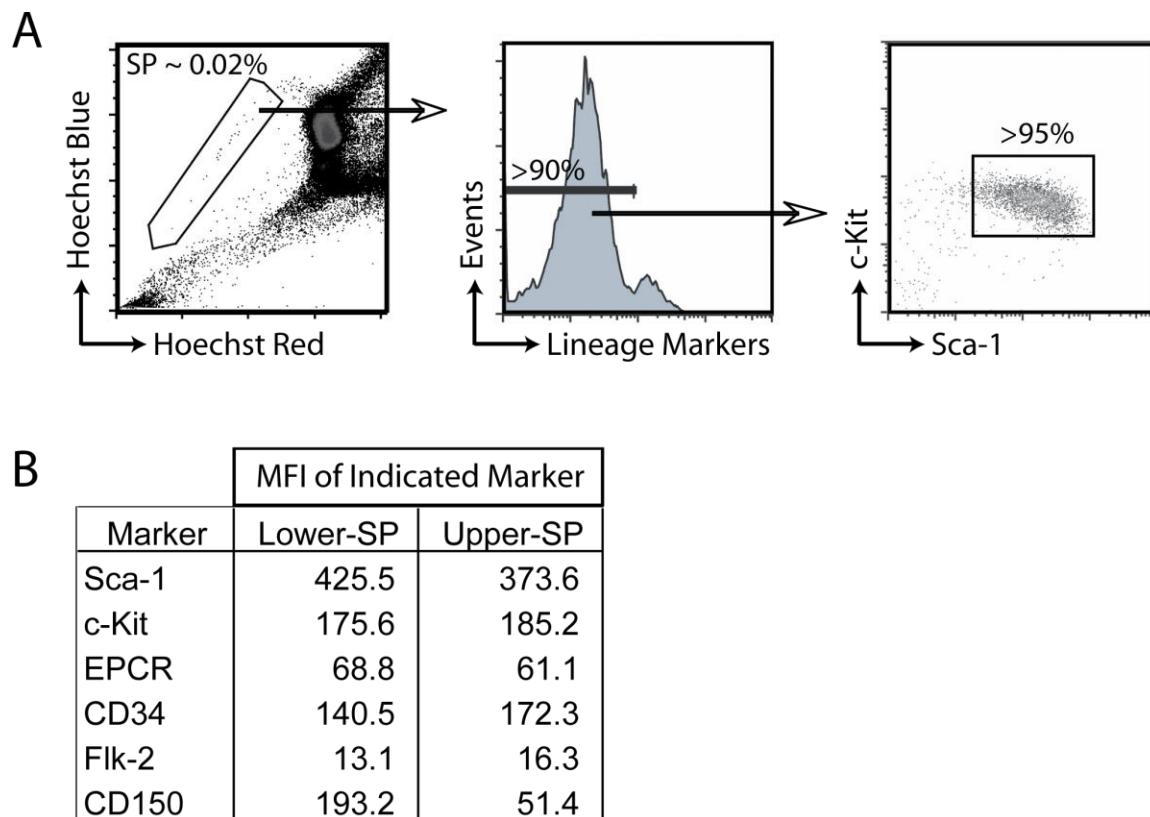

**Figure S1:** Flow cytometric analysis.

(A) Side population<sup>+</sup> Lineage<sup>-</sup> Sca-1<sup>+</sup> c-Kit<sup>+</sup> (SP<sup>KLS</sup>) gating strategy used for HSC purification. (B) Comparison of expression of common HSC markers on lower- and upper-SP<sup>KLS</sup> cells by mean fluorescent intensity.

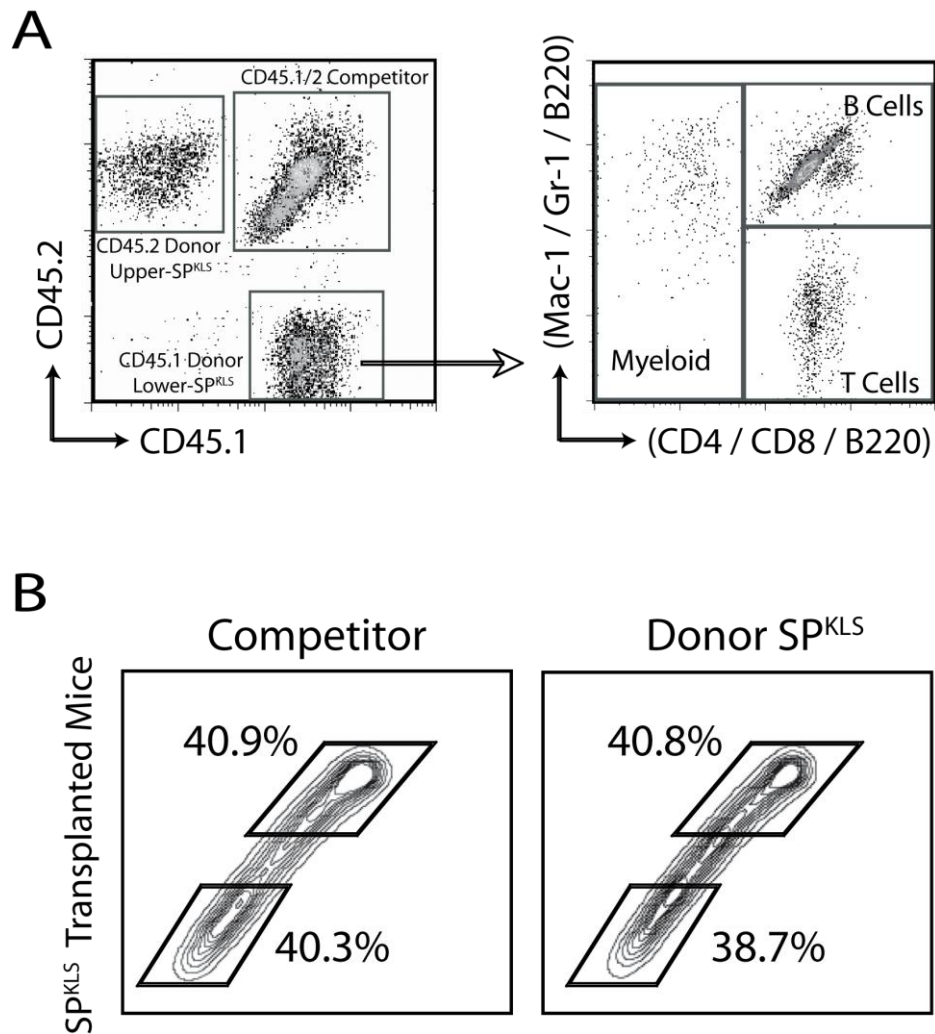

**Figure S2:** Analysis of transplanted mice.

(A) Peripheral blood sample of a mouse co-transplanted with lower- ( $CD45.1^+$ ) and upper- $SP^{KLS}$  cells ( $CD45.2^+$ ) and competitor whole bone marrow ( $CD45.1/2^+$ ) showing clear distinction of the progeny of each transplanted population in the peripheral blood. The lower- $SP^{KLS}$ -derived population is then gated for lineage distribution analysis showing myeloid, B-cell and T-cell populations. (B) Analysis of the bone marrow of mice transplanted with unfractionated  $SP^{KLS}$  along with whole bone marrow competitor for SP distribution of donor cells. In reference to the whole bone marrow competitor cells which serve as an internal control, transplantation of unfractionated  $SP^{KLS}$  donor cells regenerates the entire SP in an unbiased manner. Data presented are representative of two separate experiments.

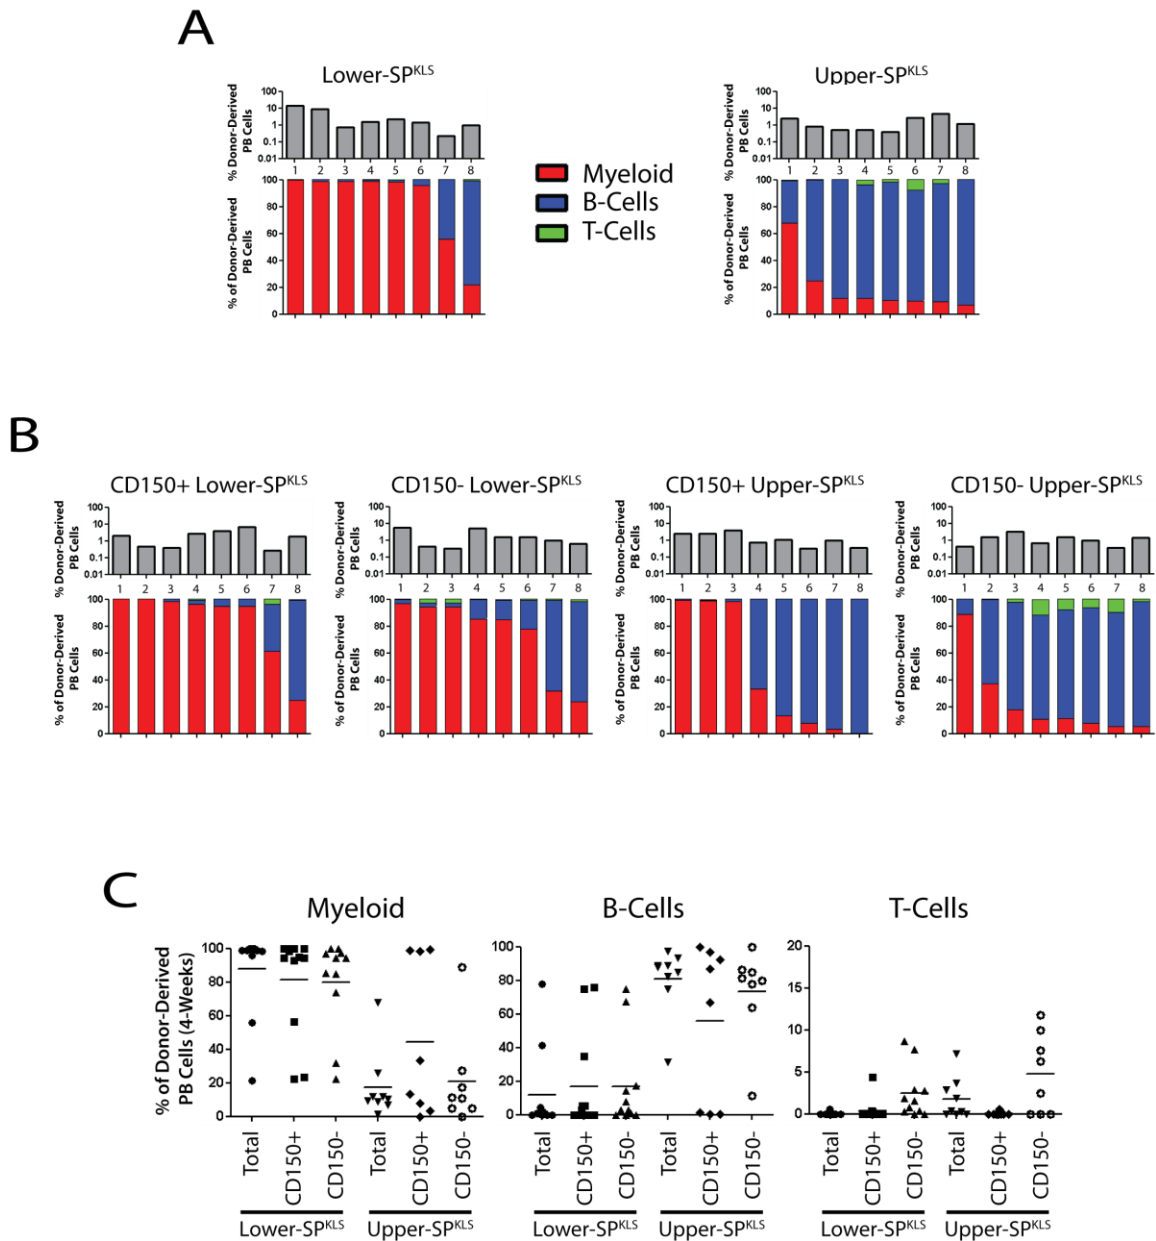

**Figure S3:** 4-week analysis of HSC subtypes using single cell transplantation.

(A) Tracking of eight individual lower- and upper-SP<sup>KLS</sup> clones showing overall hematopoietic chimerism in recipient mice (engraftment) and lineage distribution of test cells 4-weeks post-transplant. (B) Further fractionation of these populations using the CD150 marker showed subtle differences. (C) Cumulative 4-week lineage output data from a large cohort of mice transplanted with single HSCs.

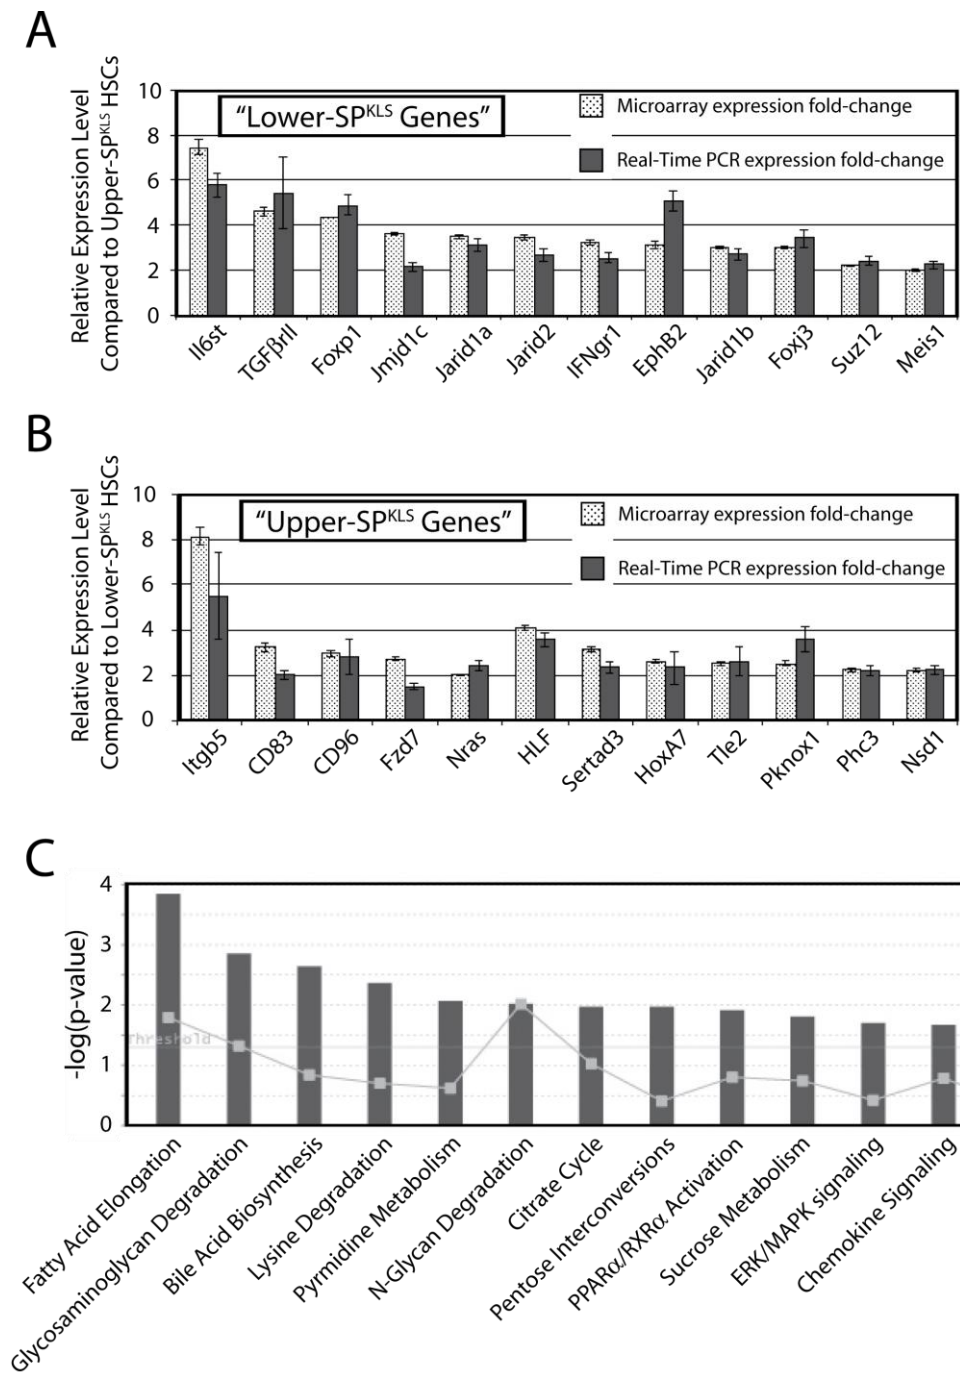

**Figure S4:** Verification of expression of differentially expressed microarray genes by real-time PCR.

Genes identified in microarrays as upregulated in lower-SP<sup>KLS</sup> cells (A) and upper-SP<sup>KLS</sup> cells (B) showed similar expression profiles when assessed by real-time PCR. (C) Ingenuity Pathway Analysis of microarray data revealed that 9 of the 12 significantly upregulated molecular pathways in upper-SP<sup>KLS</sup> cells were associated with metabolism and cell cycle, reflecting the more active nature of these HSCs.

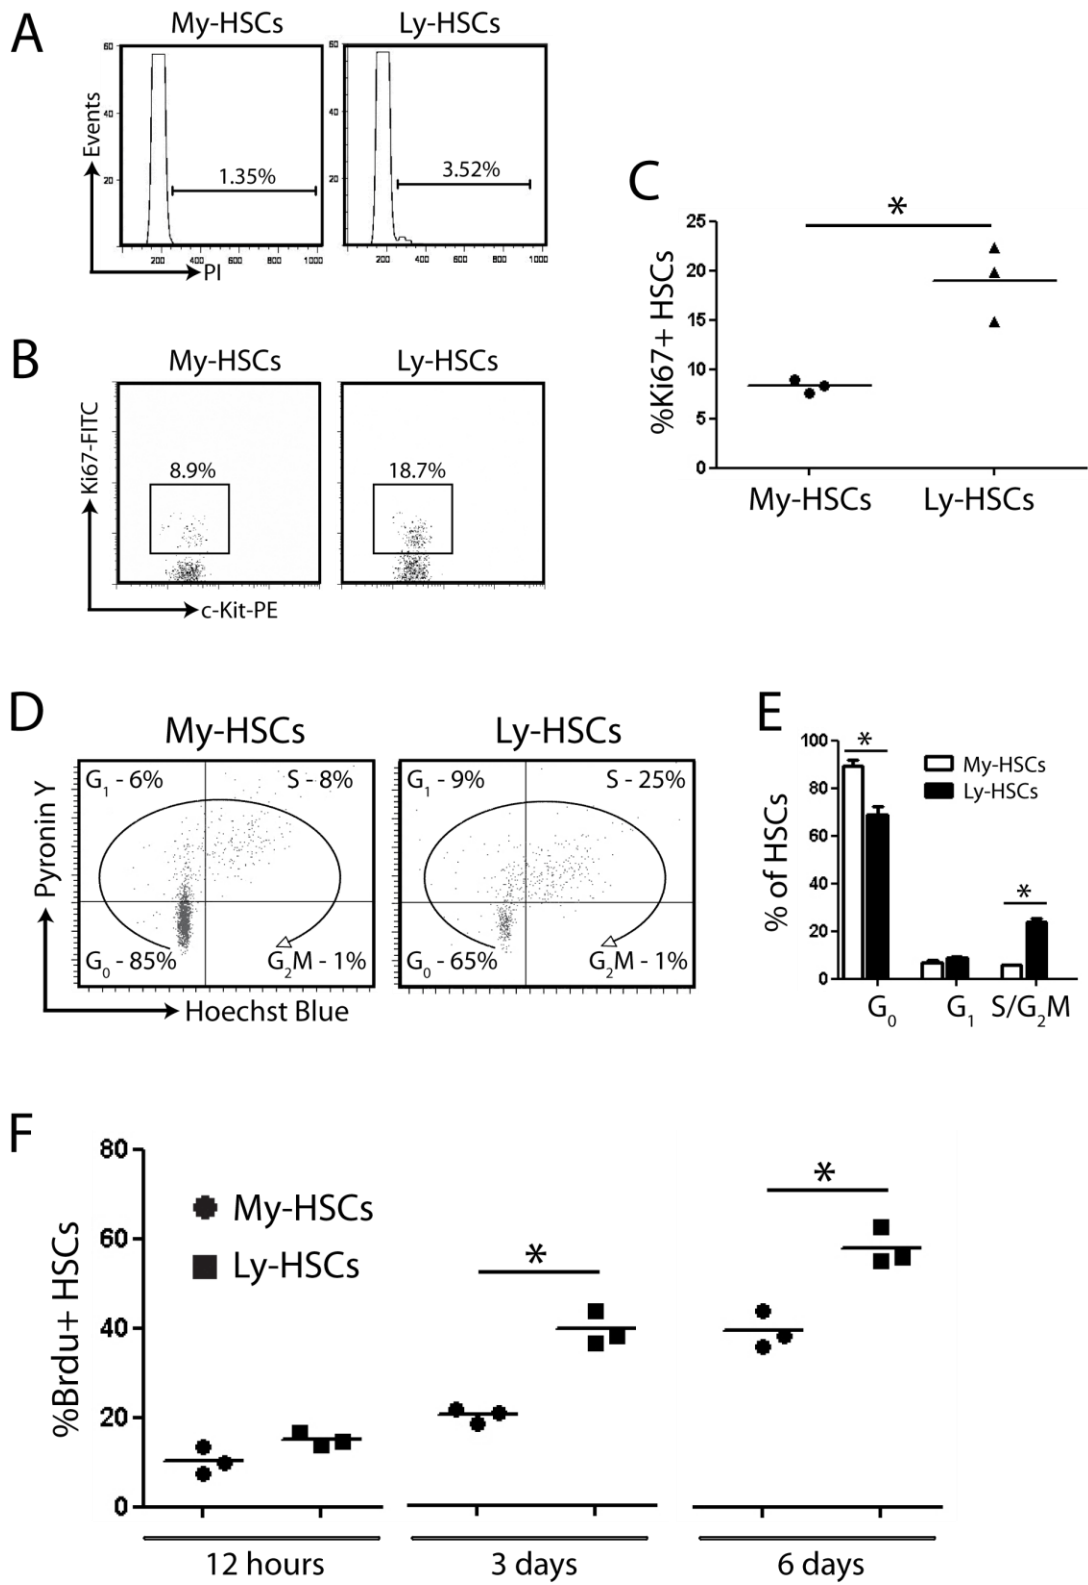

**Figure S5:** Cell cycle and proliferative status of HSC subtypes.

(A) Cell cycle analysis of purified My-HSC and Ly-HSC populations using propidium iodide staining showed on average that approximately 1% and 3% respectively of these HSC subtypes were in cycle at any given point in time under homeostatic conditions. Data presented are averages of three separate experiments. (B) Example of flow cytometric analysis of My- and Ly-HSCs for Ki67 expression. (C) Comparing three separate pools of three mice, Ly-HSCs cells showed significantly higher expression of the Ki67 protein, indicating they are more active in the cell cycle at any given point in time compared to My-HSCs. (D) Example of cell cycle status analysis of My- and Ly-HSCs by Pyronin Y staining. (E) My-HSCs consistently contained a higher proportion of HSCs in G<sub>0</sub>, or quiescence (three separate pools of three mice). (F) BrdU labeling showed that over three time periods tested (12-hours, 3-days, 6-days), the Ly-HSC population contained a higher proportion of BrdU<sup>+</sup> cells compared to My-HSCs, indicating more of this HSC subtype had turned over during these time frames (three separate pools of three mice).

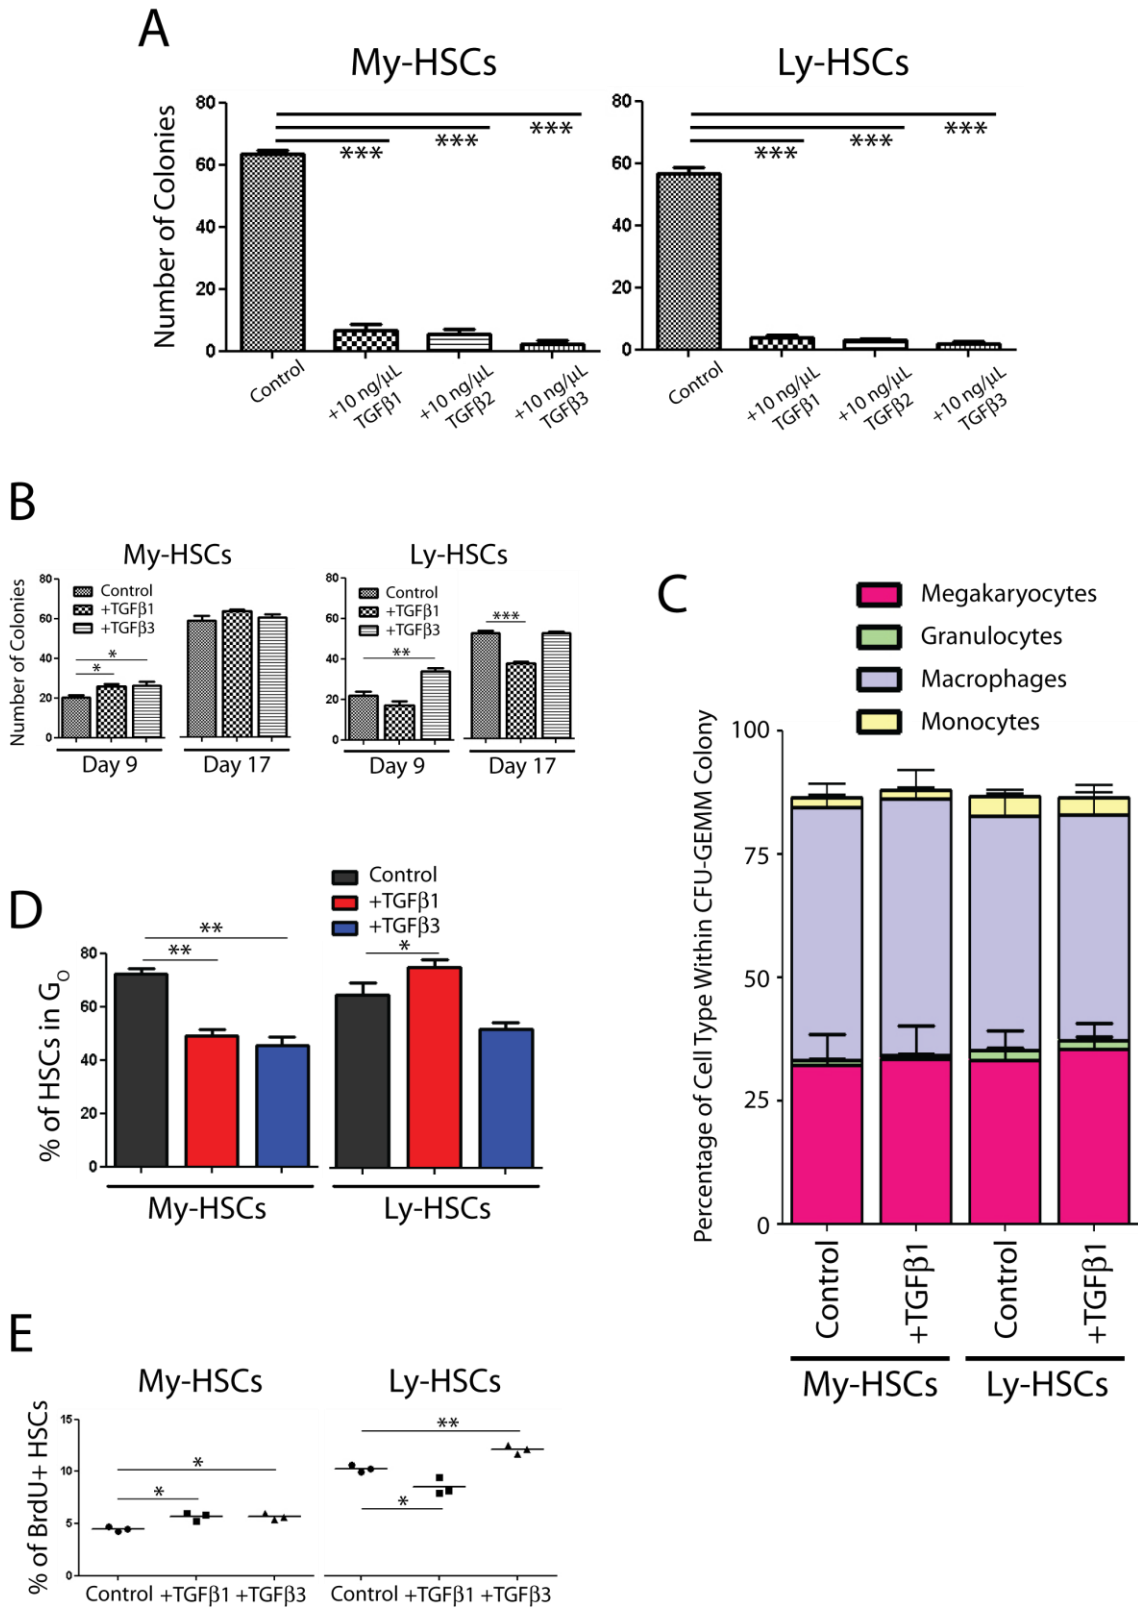



**Figure S6:** Effects of TGF $\beta$ 1 and -3 on HSC subtypes. (TGF $\beta$ 2 produced the same responses in My-HSCs and Ly-HSCs as TGF $\beta$ 1).

(A) Single My-HSCs (lower-SP<sup>KLS</sup>) or Ly-HSCs (upper-SP<sup>KLS</sup>) were sorted into individual wells of 96-well plates containing Methocult + 10 ng/ $\mu$ L TGF $\beta$ 's. At this concentration, all TGF $\beta$ 's strongly inhibited colony formation from both My- and Ly-HSCs. Data presented are cumulative of three individual experiments each comprising two replicate plates for each condition. (B) Low (10 pg/ $\mu$ L) concentrations of TGF $\beta$ 's accelerated colony formation of My-HSCs in Methocult (more colonies at day 9), but did not change the total number of colonies formed (at day 17). While TGF $\beta$ 1 proved inhibitory to Ly-HSC colony formation, addition of TGF $\beta$ 3 was stimulatory as for My-HSCs. Data presented are cumulative of three individual experiments each comprising two replicate plates for each condition. (C) TGF $\beta$ 1 did not change the distribution of myeloid cell types within individual CFU-GEMM colonies. Flow cytometric analysis of CFU-GEMM colonies with the proportion of cell types represented comprised of megakaryocytes (CD41<sup>+</sup>), granulocytes (Mac-1<sup>+</sup>Gr-1<sup>+</sup>F4/80<sup>-</sup>), macrophages (Mac-1<sup>+</sup>F4/80<sup>+</sup>) and monocytes (Mac-1<sup>+</sup>Gr-1<sup>-</sup>F4/80<sup>-</sup>). Data presented are averages of two individual experiments each comprising analysis of 20 individual CFU-GEMM colonies. (D) Pyronin Y staining of My- and Ly-HSCs following 5-hour *in vitro* exposure to TGF $\beta$ 's. All TGF $\beta$ 's stimulated My-HSCs to engage the cell cycle with a lower portion of this population in G<sub>0</sub> compared to control cells following TGF $\beta$  exposure. Conversely, exposure to TGF $\beta$ 1 impeded the normal progression into cell cycle of Ly-HSCs with a higher proportion of this population in G<sub>0</sub> following *in vitro* culture. Data presented are averages of four individual experiments. (E) Effect on HSC subtypes to *in vivo* TGF $\beta$  exposure. Injection of mice with 0.1  $\mu$ g TGF $\beta$ 's caused an increase in proliferation of My-HSCs. *in vivo* administration of TGF $\beta$ 1 inhibited Ly-HSC proliferation while TGF $\beta$ 3 enhanced the proliferation of this HSC subtype (three separate pools of three mice).

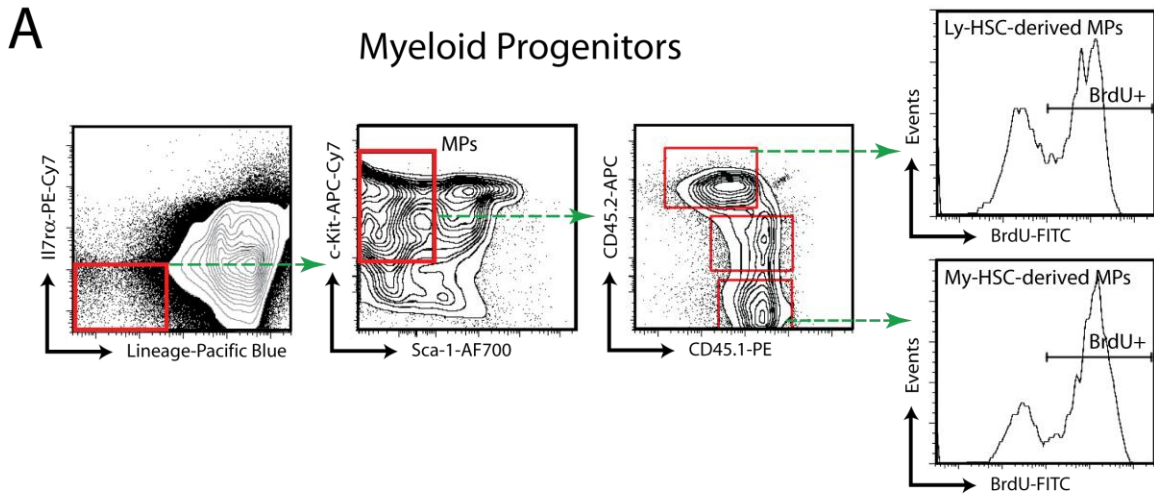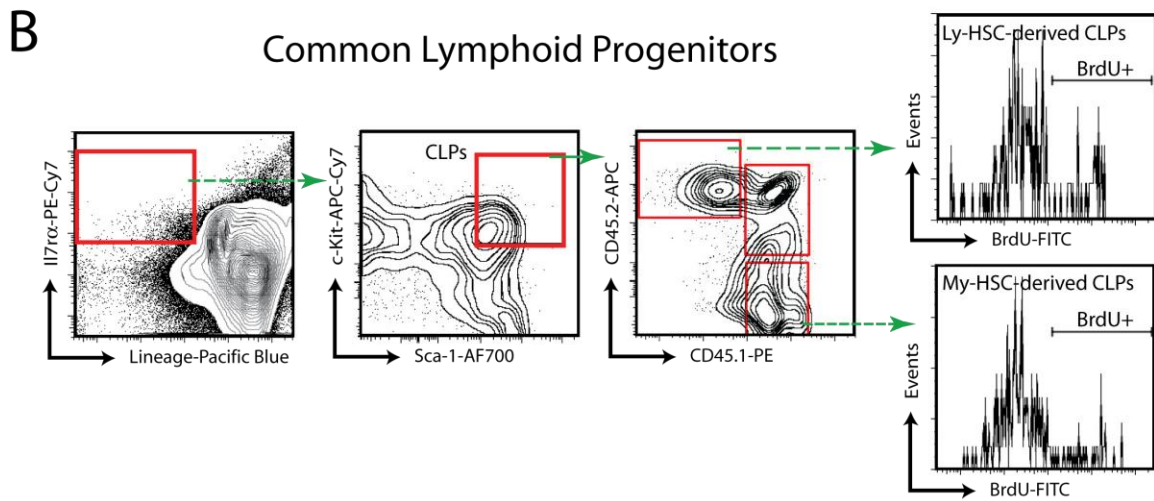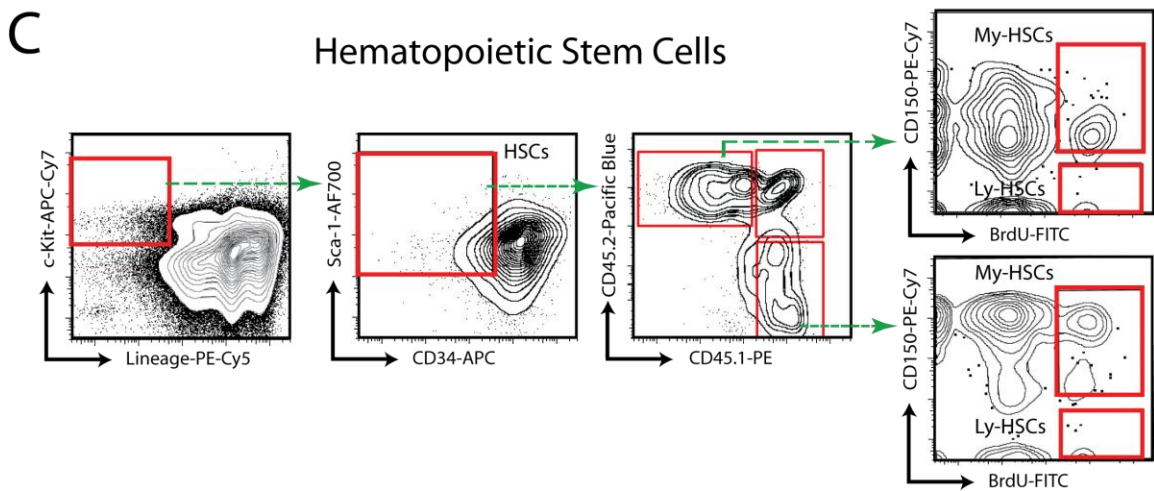

**Figure S7:** Gating scheme for analysis of effect of TGFβ1 on transplanted My-HSC and Ly-HSC populations.

Lethally irradiated CD45.1/2 mice were transplanted with 25 CD45.1 lower-SP<sup>KLS</sup> My-HSCs and 50 CD45.2 upper-SP<sup>KLS</sup> Ly-HSCs (along with 200,000 CD45.1/2 whole bone marrow competitor cells). 12-weeks post-transplant, test mice were administered three 0.1 μg TGFβ1 injections 24-hours apart and then labeled with BrdU 12-hours prior to sacrifice to determine the effect of TGFβ1 on turnover rate of various donor cell-derived stem and progenitor cell compartments. Stem and progenitor cells were identified using the following phenotypes (A) myeloid progenitors – Lineage<sup>-</sup>Il7rα<sup>7</sup>Sca-1<sup>-low</sup>c-Kit<sup>+</sup> (B) common lymphoid progenitors - Lineage<sup>-</sup>Il7rα<sup>7</sup><sup>+</sup>Sca-1<sup>+</sup>c-Kit<sup>+</sup> (C) myeloid-biased HSCs - Lineage<sup>-</sup>c-Kit<sup>+</sup>Sca-1<sup>+</sup>CD34<sup>-</sup>CD150<sup>+</sup> and lymphoid-biased HSCs Lineage<sup>-</sup>c-Kit<sup>+</sup>Sca-1<sup>+</sup>CD34<sup>-</sup>CD150<sup>-</sup>. Transplanted donor My-HSCs (CD45.1<sup>+</sup>) and Ly-HSCs (CD45.2<sup>+</sup>) were distinguished from competitor marrow (CD45.1<sup>+</sup>CD45.2<sup>+</sup>) using a combination of CD45 alleles and the turnover of each donor-derived cell compartment in response to TGFβ1 was assessed by comparing the percentage of BrdU<sup>+</sup> cells relative to control transplanted mice (PBS-injected).

## **SUPPLEMENTAL TABLES:**

**Table S1:** Statistical measures for transplantation studies.

**Table S2:** Probe information for all microarray chips.

**Table S3:** Genes upregulated in My-HSCs compared to Ly-HSCs.

**Table S4:** Genes upregulated in Ly-HSCs compared to My-HSCs.

## **SUPPLEMENTAL EXPERIMENTAL PROCEDURES:**

### **HSC Cell Cycle Analysis**

1) Propidium iodide staining: HSCs (>1500) were sorted into deionized water containing 0.1% sodium citrate and 50µg/mL propidium iodide (PI) and analyzed with a FACScan flow cytometer (BD Biosciences).

2) BrdU Incorporation Analysis: Mice received one intraperitoneal injection of BrdU (Sigma-Aldrich; 1 mg/6 g of mouse weight), followed by inclusion of BrdU in the drinking water at 0.8 mg/mL. Mice were sacrificed at 12-hours, three days and six days post-BrdU injection and HSCs were sorted from Sca-1 enriched bone marrow as (lower- or upper-) SP<sup>+</sup> Lineage-PE-Cy5<sup>-</sup> c-Kit-PE<sup>+</sup> cells into a carrier cell population of 400,000 B220-PE-Cy5<sup>+</sup> splenocytes. Samples were prepared for analysis of BrdU incorporation using the FITC-BrdU Flow Kit (BD Pharmingen). Samples were reanalyzed by flow cytometry with HSCs readily distinguishable from B220-PE-Cy5<sup>+</sup> carrier cells as c-Kit-PE<sup>+</sup> B220-PE-Cy5<sup>-</sup> and were gated for analysis of BrdU-FITC incorporation.

3) Ki67 Analysis: HSCs were sorted from pools of mice as described above into a carrier cell population of 400,000 B220-PE-Cy5<sup>+</sup> splenocytes. Sorted samples were prepared using the FITC-BrdU Flow Kit (BD Pharmingen) with the substitution of anti-Ki67-FITC (BD Pharmingen) for anti-BrdU-FITC. Samples were reanalyzed by flow cytometry and HSCs were gated for analysis of Ki67-FITC incorporation.

Table: Details of antibodies used for flow cytometry.

| <b>Epitope</b> | <b>Clone</b> | <b>Conjugate</b> | <b>Dilution</b> | <b>Company</b>        |
|----------------|--------------|------------------|-----------------|-----------------------|
| Gr-1           | RB6-8C5      | PE-Cy5           | 1:100           | eBioscience           |
|                | RB6-8C5      | FITC             | 1:100           | BD Pharmingen         |
|                | RB6-8C5      | Biotin           | 1:100           | BD Pharmingen         |
|                | RB6-8C5      | PE-Cy7           | 1:100           | eBioscience           |
| Mac-1          | M1/70        | PE-Cy5           | 1:100           | eBioscience           |
|                | M1/70        | FITC             | 1:100           | BD Pharmingen         |
|                | M1/70        | Biotin           | 1:100           | BD Pharmingen         |
|                | M1/70        | PE-Cy7           | 1:100           | BD Pharmingen         |
| B220           | RA3-6B2      | PE-Cy5           | 1:100           | eBioscience           |
|                | RA3-6B2      | FITC             | 1:100           | BD Pharmingen         |
|                | RA3-6B2      | Biotin           | 1:100           | BD Pharmingen         |
|                | RA3-6B2      | PE-Cy7           | 1:100           | BD Pharmingen         |
|                | RA3-6B2      | Pacific Blue     | 1:100           | BD Pharmingen         |
| Ter119         | TER119       | PE-Cy5           | 1:100           | eBioscience           |
|                | TER119       | FITC             | 1:100           | BD Pharmingen         |
|                | TER119       | Biotin           | 1:100           | BD Pharmingen         |
| CD4            | RM4-5        | PE-Cy5           | 1:100           | eBioscience           |
|                | GK1.5        | FITC             | 1:100           | BD Pharmingen         |
|                | H129.19      | Biotin           | 1:100           | BD Pharmingen         |
|                | RM4-5        | Pacific Blue     | 1:100           | BD Pharmingen         |
| CD8            | 53-6.7       | PE-Cy5           | 1:100           | eBioscience           |
|                | 53-6.7       | FITC             | 1:100           | BD Pharmingen         |
|                | 53-6.7       | Biotin           | 1:100           | BD Pharmingen         |
|                | 53-6.7       | Pacific Blue     | 1:100           | BD Pharmingen         |
| CD3            | 145-2C11     | Biotin           | 1:100           | BD Pharmingen         |
| CD19           | 1D3          | Biotin           | 1:100           | BD Pharmingen         |
| Sca-1          | E13-161.7    | PE               | 1:100           | BD Pharmingen         |
|                | E13-161.7    | FITC             | 1:100           | BD Pharmingen         |
|                | D7           | APC              | 1:100           | eBioscience           |
|                | D7           | PE-Cy7           | 1:100           | eBioscience           |
|                | E13-161.7    | Biotin           | 1:100           | BD Pharmingen         |
| c-Kit          | 2B8          | PE               | 1:100           | BD Pharmingen         |
|                | 2B8          | FITC             | 1:100           | BD Pharmingen         |
|                | 2B8          | APC              | 1:100           | eBioscience           |
|                | 2B8          | AlexaFluor-750   | 1:100           | eBioscience           |
|                | 2B8          | Biotin           | 1:100           | eBioscience           |
| Il7 $\alpha$   | A7R34        | PE-Cy7           | 1:100           | eBioscience           |
| Flk-2          | A2F10.1      | PE               | 1:50            | BD Pharmingen         |
| CD34           | RAM34        | AlexaFluor-647   | 1:50            | eBioscience           |
| CD150          | TC15-12F12.2 | PE               | 1:100           | BioLegend             |
|                | TC15-12F12.2 | PE-Cy7           | 1:100           | BioLegend             |
| EPCR           | RMEPCR1560   | FITC             | 1:100           | StemCell Technologies |
| CD45.1         | A20          | PE               | 1:100           | BD Pharmingen         |
|                | A20          | FITC             | 1:100           | BD Pharmingen         |
|                | A20          | Biotin           | 1:100           | BD Pharmingen         |
| CD45.2         | 104          | PE               | 1:100           | eBioscience           |
|                | 104          | APC              | 1:100           | eBioscience           |
|                | 104          | Biotin           | 1:100           | eBioscience           |
| CD48           | HM48-1       | APC              | 1:100           | eBioscience           |
